# Supplementary material
Source: MDPI journal article supplement (https://www.mdpi.com/2073-4441/16/10/1360)
Supplement: s1 [file s1 › water-3002202-supplementary.pdf]

# Supplement: Polystyrene Plastic Particles Result in Adverse Outcomes for *Hyaletta azteca* When Exposed at Elevated Temperatures

Biefel F <sup>1,2</sup>, Brander SM<sup>3</sup>, Cannon RE<sup>1</sup>, Geist J<sup>2\*</sup>

<sup>1</sup>Anatomy, Physiology & Cell Biology, School of Veterinary Medicine, University of California at Davis, One Shields Avenue, Davis, CA 95616, USA

<sup>2</sup>Aquatic Systems Biology Unit, TUM School of Life Sciences, Technical University of Munich, 85354 Freising, Germany

<sup>3</sup>Department of Fisheries, Wildlife, and Conservation Sciences, Coastal Oregon Marine Experiment Station, Oregon State University, Newport, OR 97365, USA

\*Correspondence to: J. Geist, Aquatic Systems Biology Unit, Department of Ecology and Ecosystem Management, Technische Universität München, Mühlenweg 22, D-85354 Freising, Germany. E-mail: [geist@tum.de](mailto:geist@tum.de)

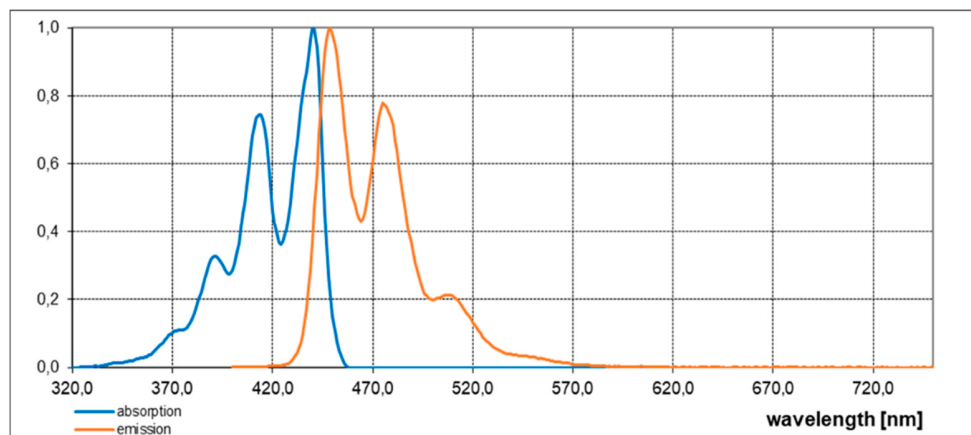

**Figure S1.** Spectral absorption and emission graph of polystyrene beads. Blue fluorescent beads with a mean diameter of 519 and 1294 nm were ordered from Applied Microspheres GmbH (formerly BS-Partikel GmbH, Mainz, Germany) at a concentration of 5 % m/m (Surface: not-modified polystyrol, no surface functionalization, sulfonic acid end group).

**Table S1.** Tested polystyrene concentrations in the range finder study (\*). “Conc. 5” was used in the main exposure study.

|         |       | Original solution | Stock solution (1:10000) | Conc. 1    | Conc. 2   | Conc. 3  | Conc. 4   | Conc. 5    |
|---------|-------|-------------------|--------------------------|------------|-----------|----------|-----------|------------|
|         | % wt  | 5                 | 0.0005                   |            |           |          |           |            |
|         | g/mL  | 0.05              | 0.000005                 |            |           |          |           |            |
|         | mg/L  | 50,000            | 5                        | 0.00000431 | 0.0000431 | 0.000431 | 0.0431    | 0.431      |
|         | ng/mL | 50,000,000        | 5000                     | 0.00431    | 0.0431    | 0.431    | 43.1      | 431        |
| 500 nm  | p/mL  |                   |                          | 640        | 6400      | 64,000   | 6,400,000 | 64,000,000 |
| 1000 nm | p/mL  |                   |                          | 80         | 800       | 8000     | 800,000   | 8,000,000  |

\* A range finder conducted without the presence of food particles, aimed to evaluate the effects of a wide range of concentrations on survival, growth, swimming behavior, and confocal imaging outcomes. The goal was to determine a concentration that leads to behavioral differences compared to controls and shows particle uptake clearly. The survival rates, total length, and raw data of TDM were assessed at five concentrations at the medium temperature of 24 °C over a period of 96 hours. No significant differences were observed. The TDM of the control group (N = 6) had a mean of  $2171.3 \pm 377.4$  mm, the 500 nm treatment group (N = 30) a mean of  $1847.4 \pm 413.4$  mm, and the 1000 nm treatment group (N = 30) a mean of  $2293.0 \pm 628.7$  mm. The study aimed to distinguish clear differences in

fluorescent levels between the noise of control specimens and those exposed. To deepen understanding of fluctuations in particle uptake across different temperatures and the potential particle mobility, the primary investigation utilized a concentration of 0.43 mg/l of fluorescent PS beads. While this concentration lacks ecological significance, it facilitated a detailed examination of mechanistic relationships among endpoints and exhibited uptake differences from controls compared to lower concentrations. Additionally, we added food particles in the primary investigation to increase uptake. This study prioritized elucidating the interconnectedness of various factors over mimicking environmental conditions with concentrations.

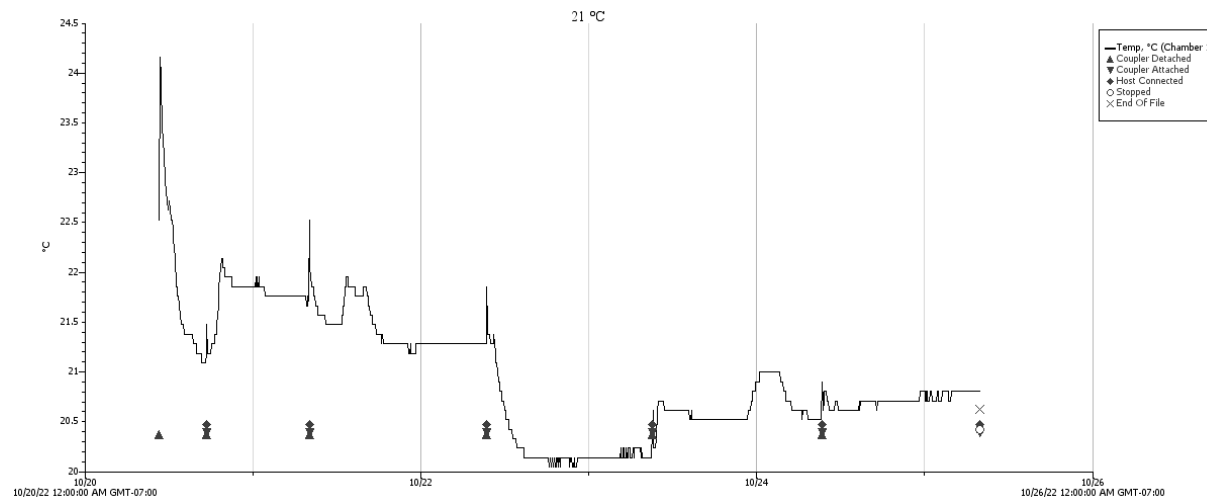

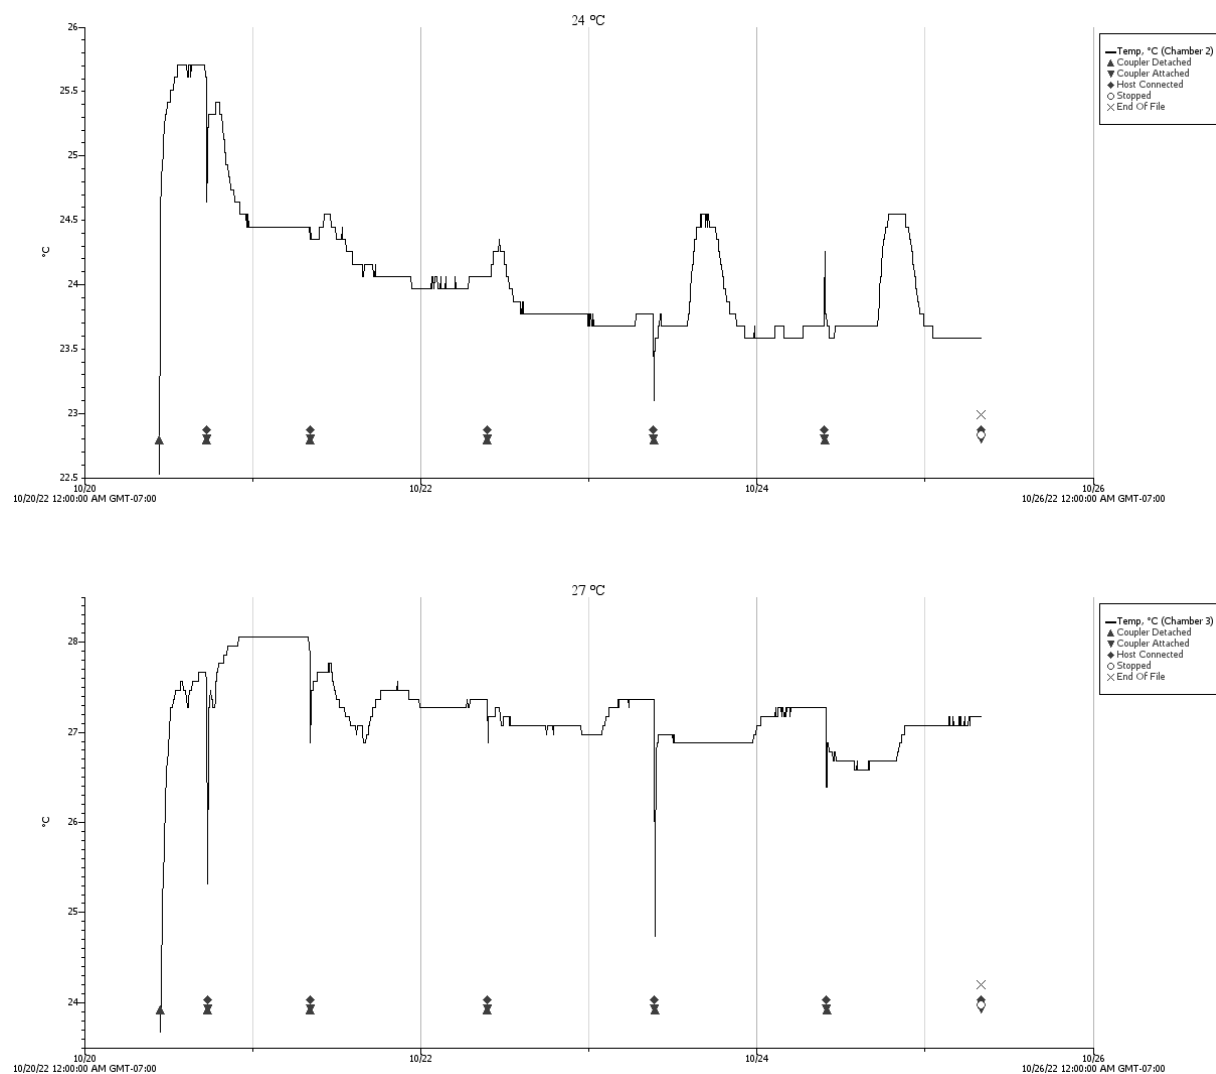

**Figure S2.** Temperature logger data from each climate chamber set to 21, 24, and 27 °C during the 96-h exposure starting on 10/21.

**Table S2.** Water parameters were measured via YSI during the 96-h exposure of *H. azteca* to polystyrene particles at three temperatures (21 °C, 24 °C, 27 °C). The three temperatures were regulated in climate chambers (Ch1-3).

| Date | Chamber              | Temperature (°C) | p.H.<br>(S.U.) | D.O.<br>(mg/L) | D. O.<br>(%) | Salinity (ppt) | Conductivity (λ) |
|------|----------------------|------------------|----------------|----------------|--------------|----------------|------------------|
| 0h   | Ch1                  | 21.2             | 8.5            | 8.6            | 97.5         | 0.2            | 543              |
|      | Ch2                  | 23.1             | 8.5            | 8.6            | 98.7         | 0.2            | 570              |
|      | Ch3                  | 25.5             | 8.5            | 9.1            | 104.5        | 0.2            | 553              |
|      | 100ml unloaded water |                  | 8.5            |                | 93.0         | 0.2            |                  |
| 24h  | Ch1                  | 21.4             | 8.5            | 8.6            | 98.3         | 0.2            | 490              |
|      | Ch2                  | 23.8             | 8.5            | 8.6            | 99.7         | 0.2            | 495              |
|      | Ch3                  | 26.6             | 8.6            | 8.9            | 103.1        | 0.2            | 503              |
| 48h  | Ch1                  | 20.1             | 8.5            | 8.8            | 97.2         | 0.2            | 499              |
|      | Ch2                  | 23.6             | 8.6            | 8.8            | 100.7        | 0.2            | 501              |
|      | Ch3                  | 26.4             | 8.6            | 8.7            | 101.9        | 0.2            | 503              |
| 72h  | Ch1                  | 20.9             | 8.6            | 8.2            | 94.1         | 0.2            | 515              |
|      | Ch2                  | 23.9             | 8.6            | 8.4            | 98.2         | 0.2            | 514              |
|      | Ch3                  | 26.4             | 8.6            | 8.8            | 101.7        | 0.2            | 520              |
| 96h  | Ch1                  | 20.9             | 8.6            | 8.8            | 98.0         | 0.2            | 530              |
|      | Ch2                  | 23.3             | 8.6            | 9              | 101.4        | 0.2            | 548              |
|      | Ch3                  | 25.9             | 8.6            | 9.2            | 105.3        | 0.2            | 550              |
| Mean | Ch1                  | 20.8             | 8.6            | 8.6            | 96.9         | 0.2            | 508.5            |
|      | Ch2                  | 23.7             | 8.6            | 8.7            | 100.0        | 0.2            | 514.5            |
|      | Ch3                  | 26.3             | 8.6            | 8.9            | 103.0        | 0.2            | 519.0            |
| SEM  | Ch1                  | 0.3              | 0.0            | 0.1            | 1.0          | 0.0            | 8.8              |
|      | Ch2                  | 0.1              | 0.0            | 0.1            | 0.7          | 0.0            | 11.8             |
|      | Ch3                  | 0.1              | 0.0            | 0.1            | 0.8          | 0.0            | 11.1             |

**Table S3.** Correlation between *H. azteca* behavioral parameters (either TDM or thigmotaxis) and the polystyrene particle treatment (control, 500 nm, 1000 nm), or the temperature (21 °C, 24 °C, 27 °C) in the dark and light period. Spearman correlation matrix: \*  $p < 0.05$  are marked in red.

| Spearman<br>Correlation           | Condition | Periods   |          |           |          |
|-----------------------------------|-----------|-----------|----------|-----------|----------|
|                                   |           | Dark      |          | Light     |          |
|                                   |           | <i>rs</i> | <i>p</i> | <i>rs</i> | <i>p</i> |
| Treatment vs.<br>TDM              | 21 °C     | -0.15     | 0.05     | -0.15     | 0.06     |
|                                   | 24 °C     | 0.06      | 0.42     | 0.04      | 0.58     |
|                                   | 27 °C     | 0.09      | 0.25     | 0.03      | 0.71     |
| Treatment vs.<br>Thigmotaxis      | 21 °C     | 0.04      | 0.62     | 0.09      | 0.24     |
|                                   | 24 °C     | -0.04     | 0.61     | -0.07     | 0.40     |
|                                   | 27 °C     | 0.00      | 0.99     | 0.01      | 0.86     |
| Treatment vs.<br>Velocity         | 21 °C     | -0.15     | 0.05     | -0.15     | 0.06     |
|                                   | 24 °C     | 0.06      | 0.43     | 0.04      | 0.58     |
|                                   | 27 °C     | 0.09      | 0.24     | 0.03      | 0.71     |
| Temperature<br>vs. TDM            | Control   | -0.22     | 0.01     | -0.17     | 0.03     |
|                                   | 500nm     | 0.13      | 0.10     | 0.14      | 0.07     |
|                                   | 1000nm    | 0.02      | 0.81     | 0.00      | 0.99     |
| Temperature<br>vs.<br>Thigmotaxis | Control   | 0.09      | 0.26     | 0.13      | 0.10     |
|                                   | 500nm     | -0.03     | 0.75     | -0.13     | 0.10     |
|                                   | 1000nm    | 0.06      | 0.48     | 0.03      | 0.69     |
| Temperature<br>vs. Velocity       | Control   | -0.22     | 0.01     | -0.17     | 0.03     |
|                                   | 500nm     | 0.13      | 0.10     | 0.14      | 0.07     |
|                                   | 1000nm    | 0.02      | 0.82     | 0.00      | 1.00     |

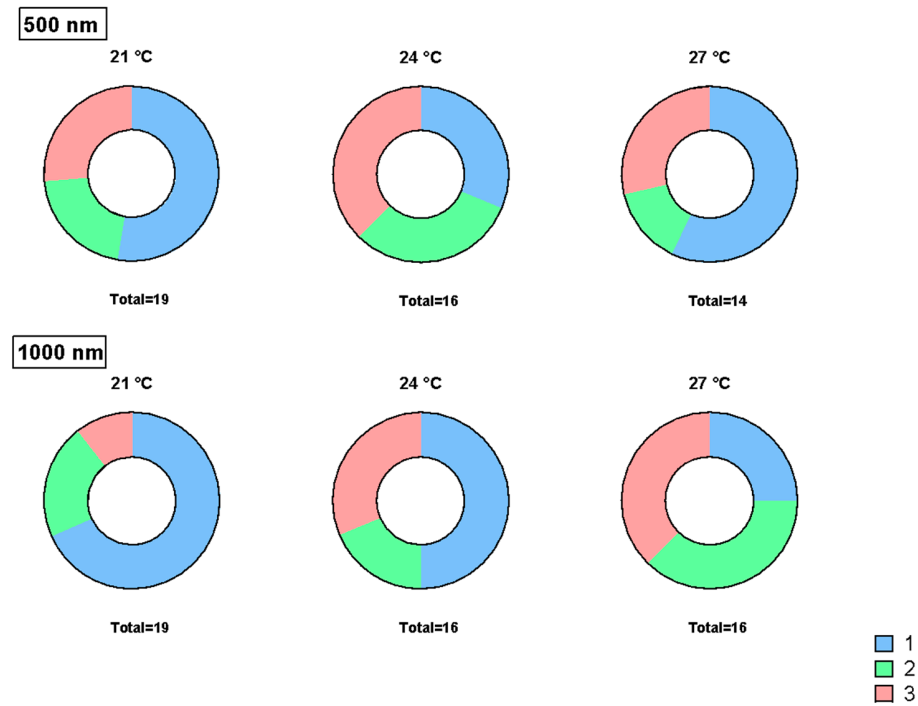

**Figure S3.** Uptake across particle (500 nm or 1000 nm sized polystyrene particles) and temperature treatments of pooled *H. azteca* (N = 14-19) by ranking: 1 = minor fluorescence (only stomach and mouth parts), 2 = fluorescence additionally in parts of the guts, 3 = fluorescence in the majority of the gut.

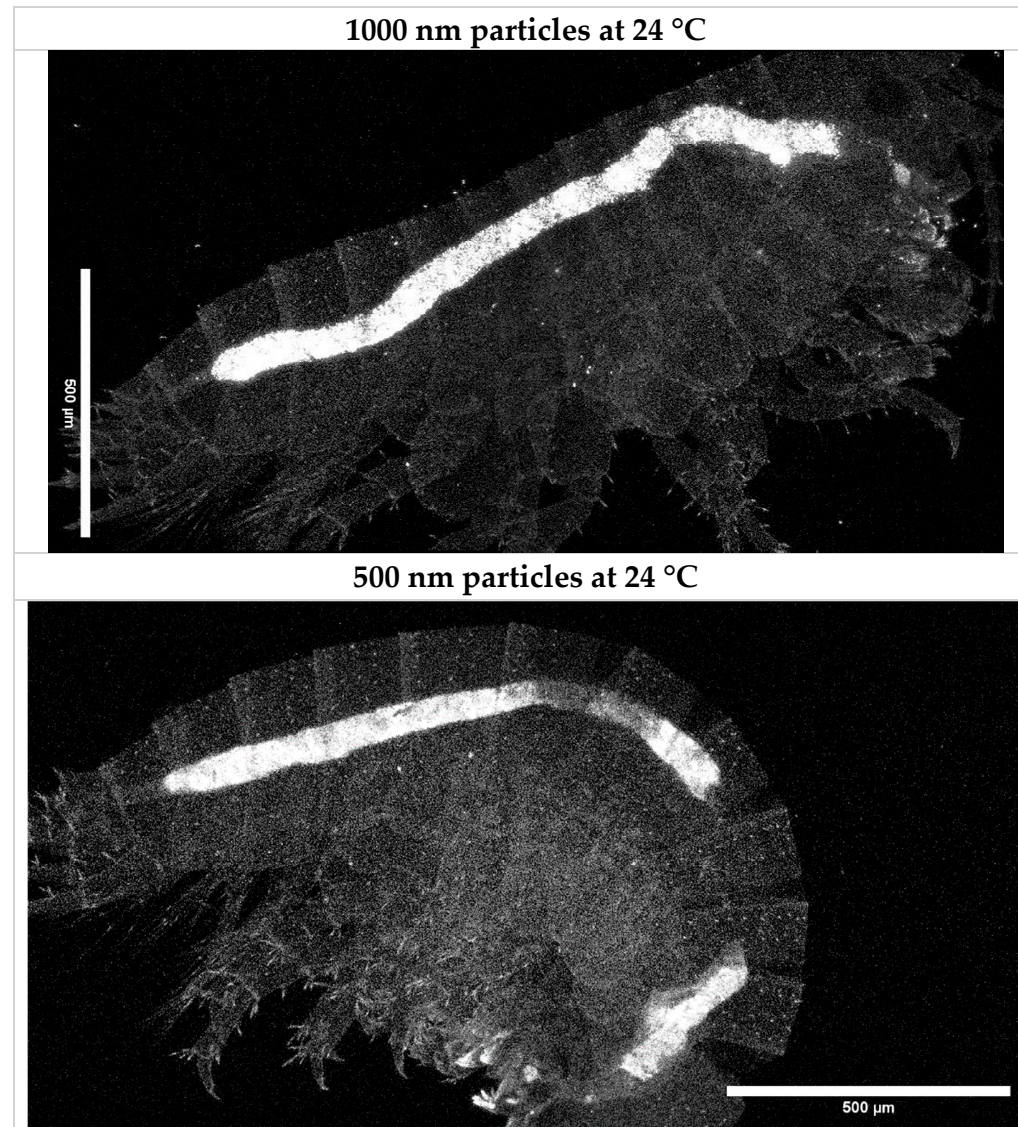

**Figure S4.** Examples of confocal images for quantifying fluorescent 500 nm or 1000 nm polystyrene particle uptake by *H. azteca* at 24 °C: Maximal intensity of z-stack layers.

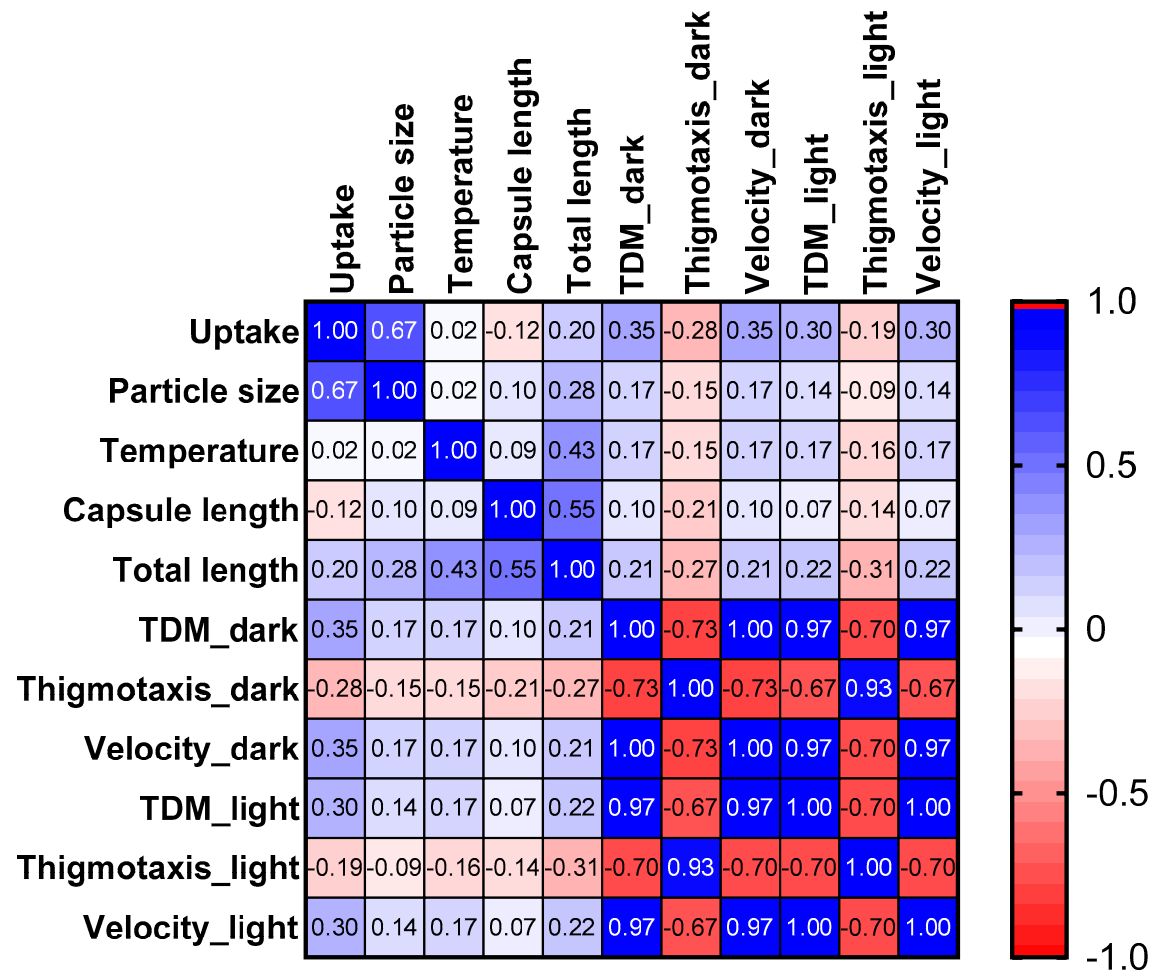

**Figure S5.** Correlation between PS uptake and endpoints: Spearman correlation ( $r_s$  values) between *H. azteca* (N = 52) uptake and further endpoints. Strongest correlation: Uptake vs. particle size ( $r_s = 0.67$ ;  $p = <0.001$ ). The  $r$  values of 0-0.19 are commonly regarded as very weak, 0.2-0.39 as weak, 0.40-0.59 as moderate, 0.6-0.79 as strong and 0.8-1 as very strong.
